# Supplementary figures and images for: Solvent selection for polymers enabled by generalized chemical fingerprinting and machine learning
Source: Royal Society of Chemistry journal article supplement (doi:10.1039/d2cp03735a), 2022-01-01

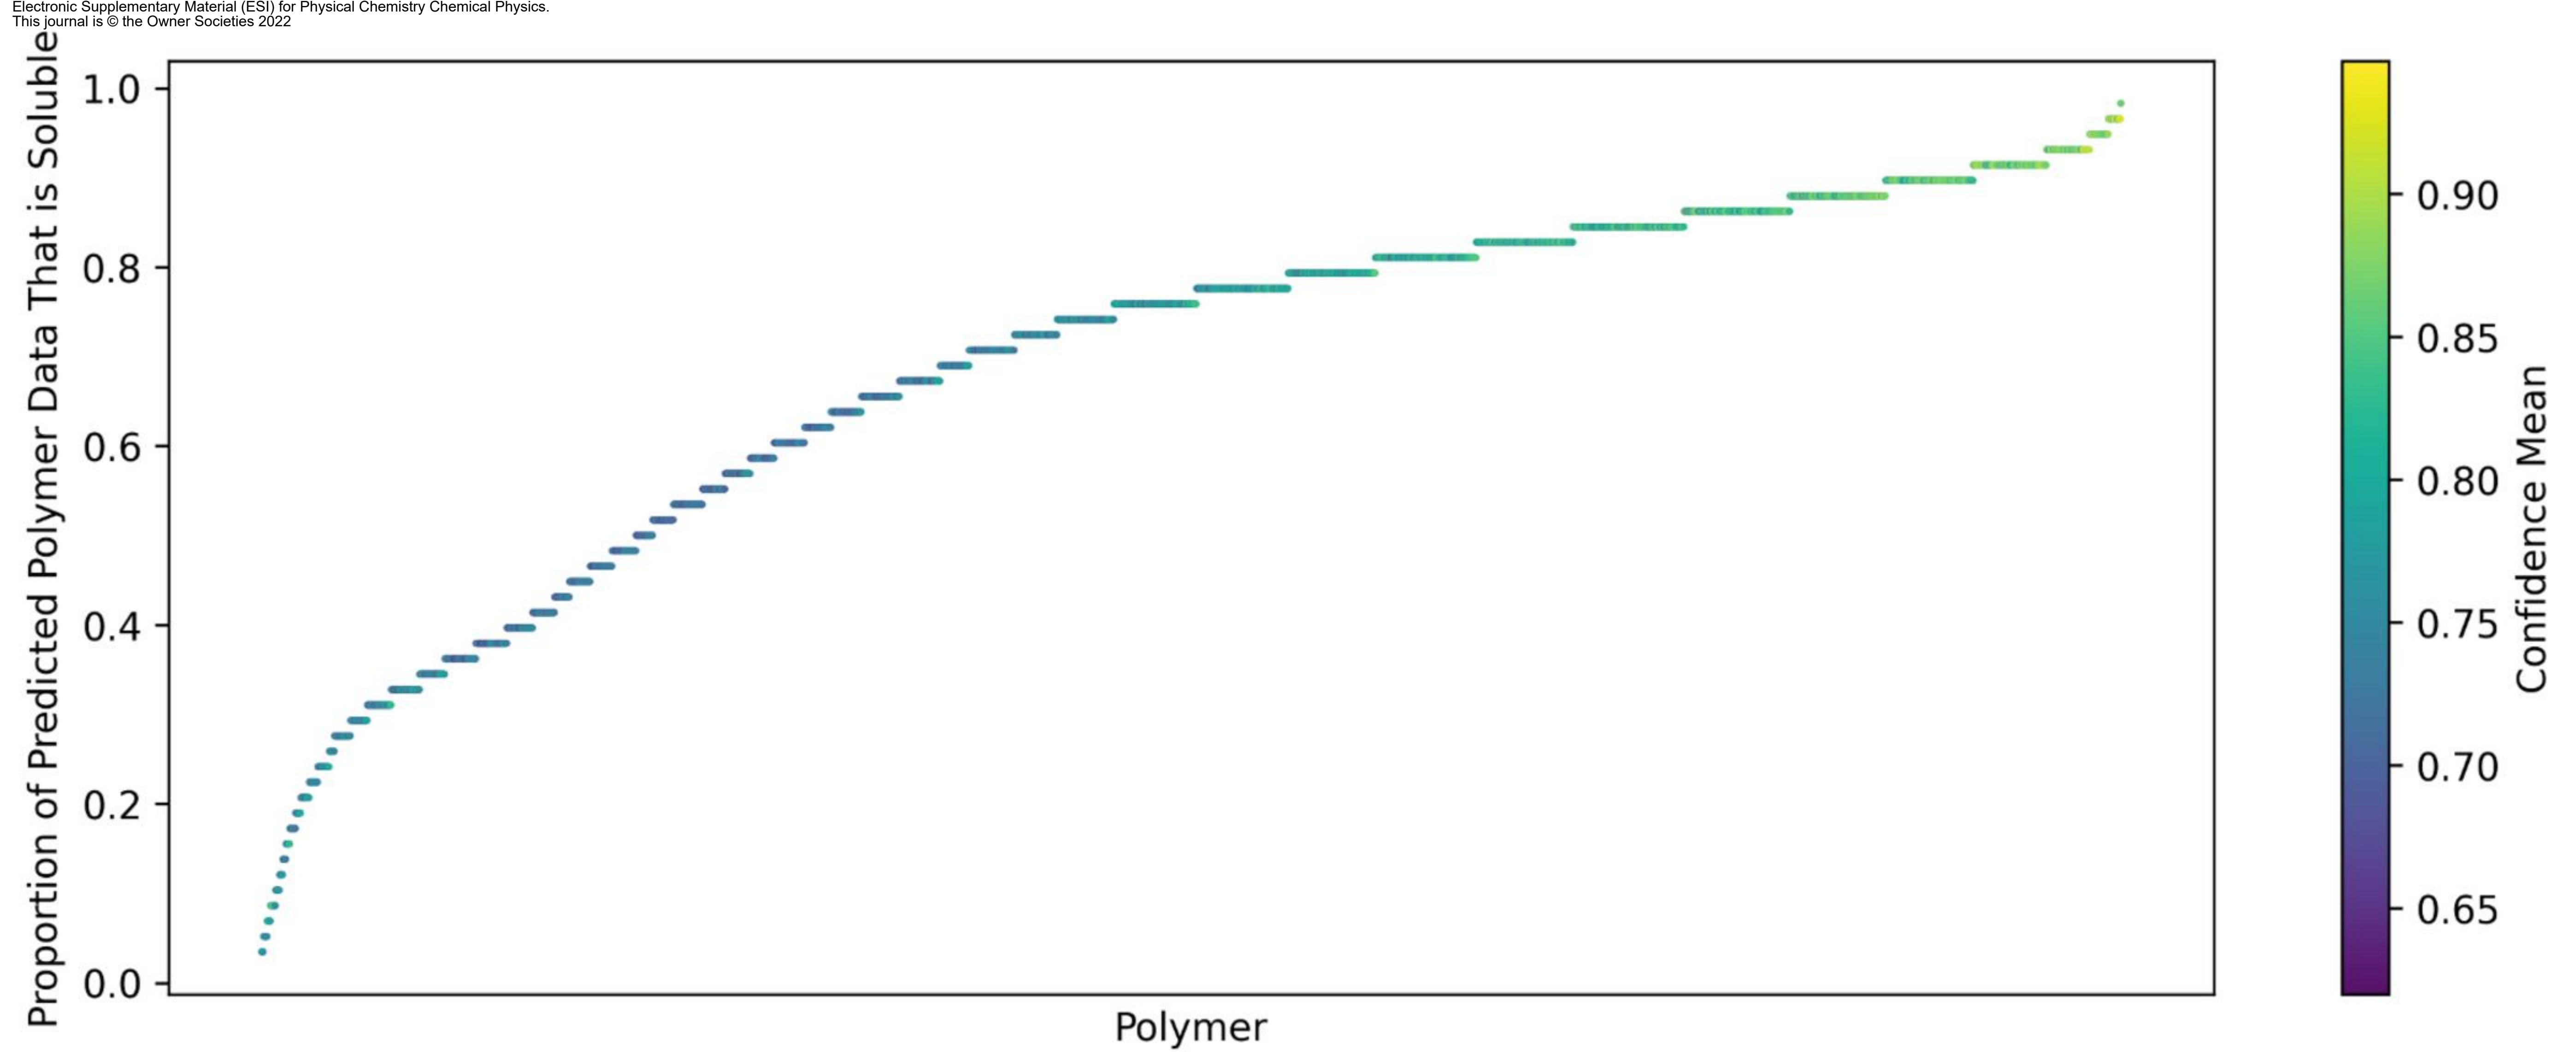

Supplement: d2cp03735a3.pdf [file d2cp03735a3.pdf]

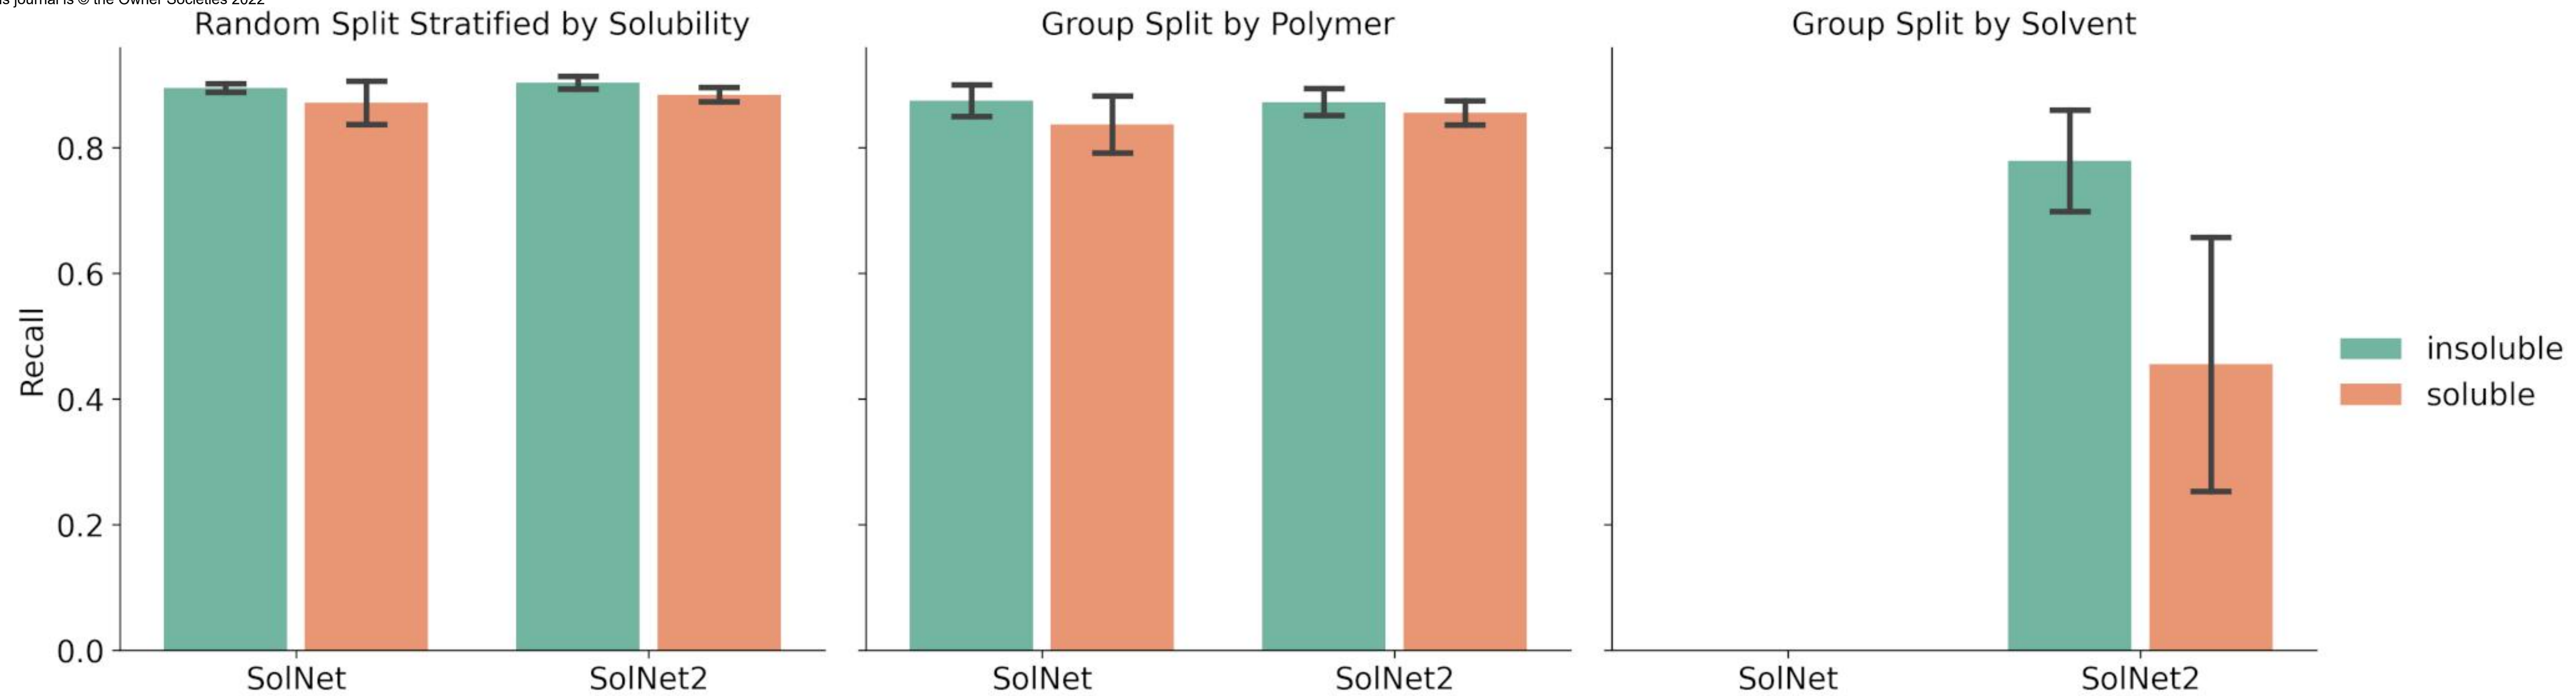

Supplement: d2cp03735a5.pdf [file d2cp03735a5.pdf]

a)

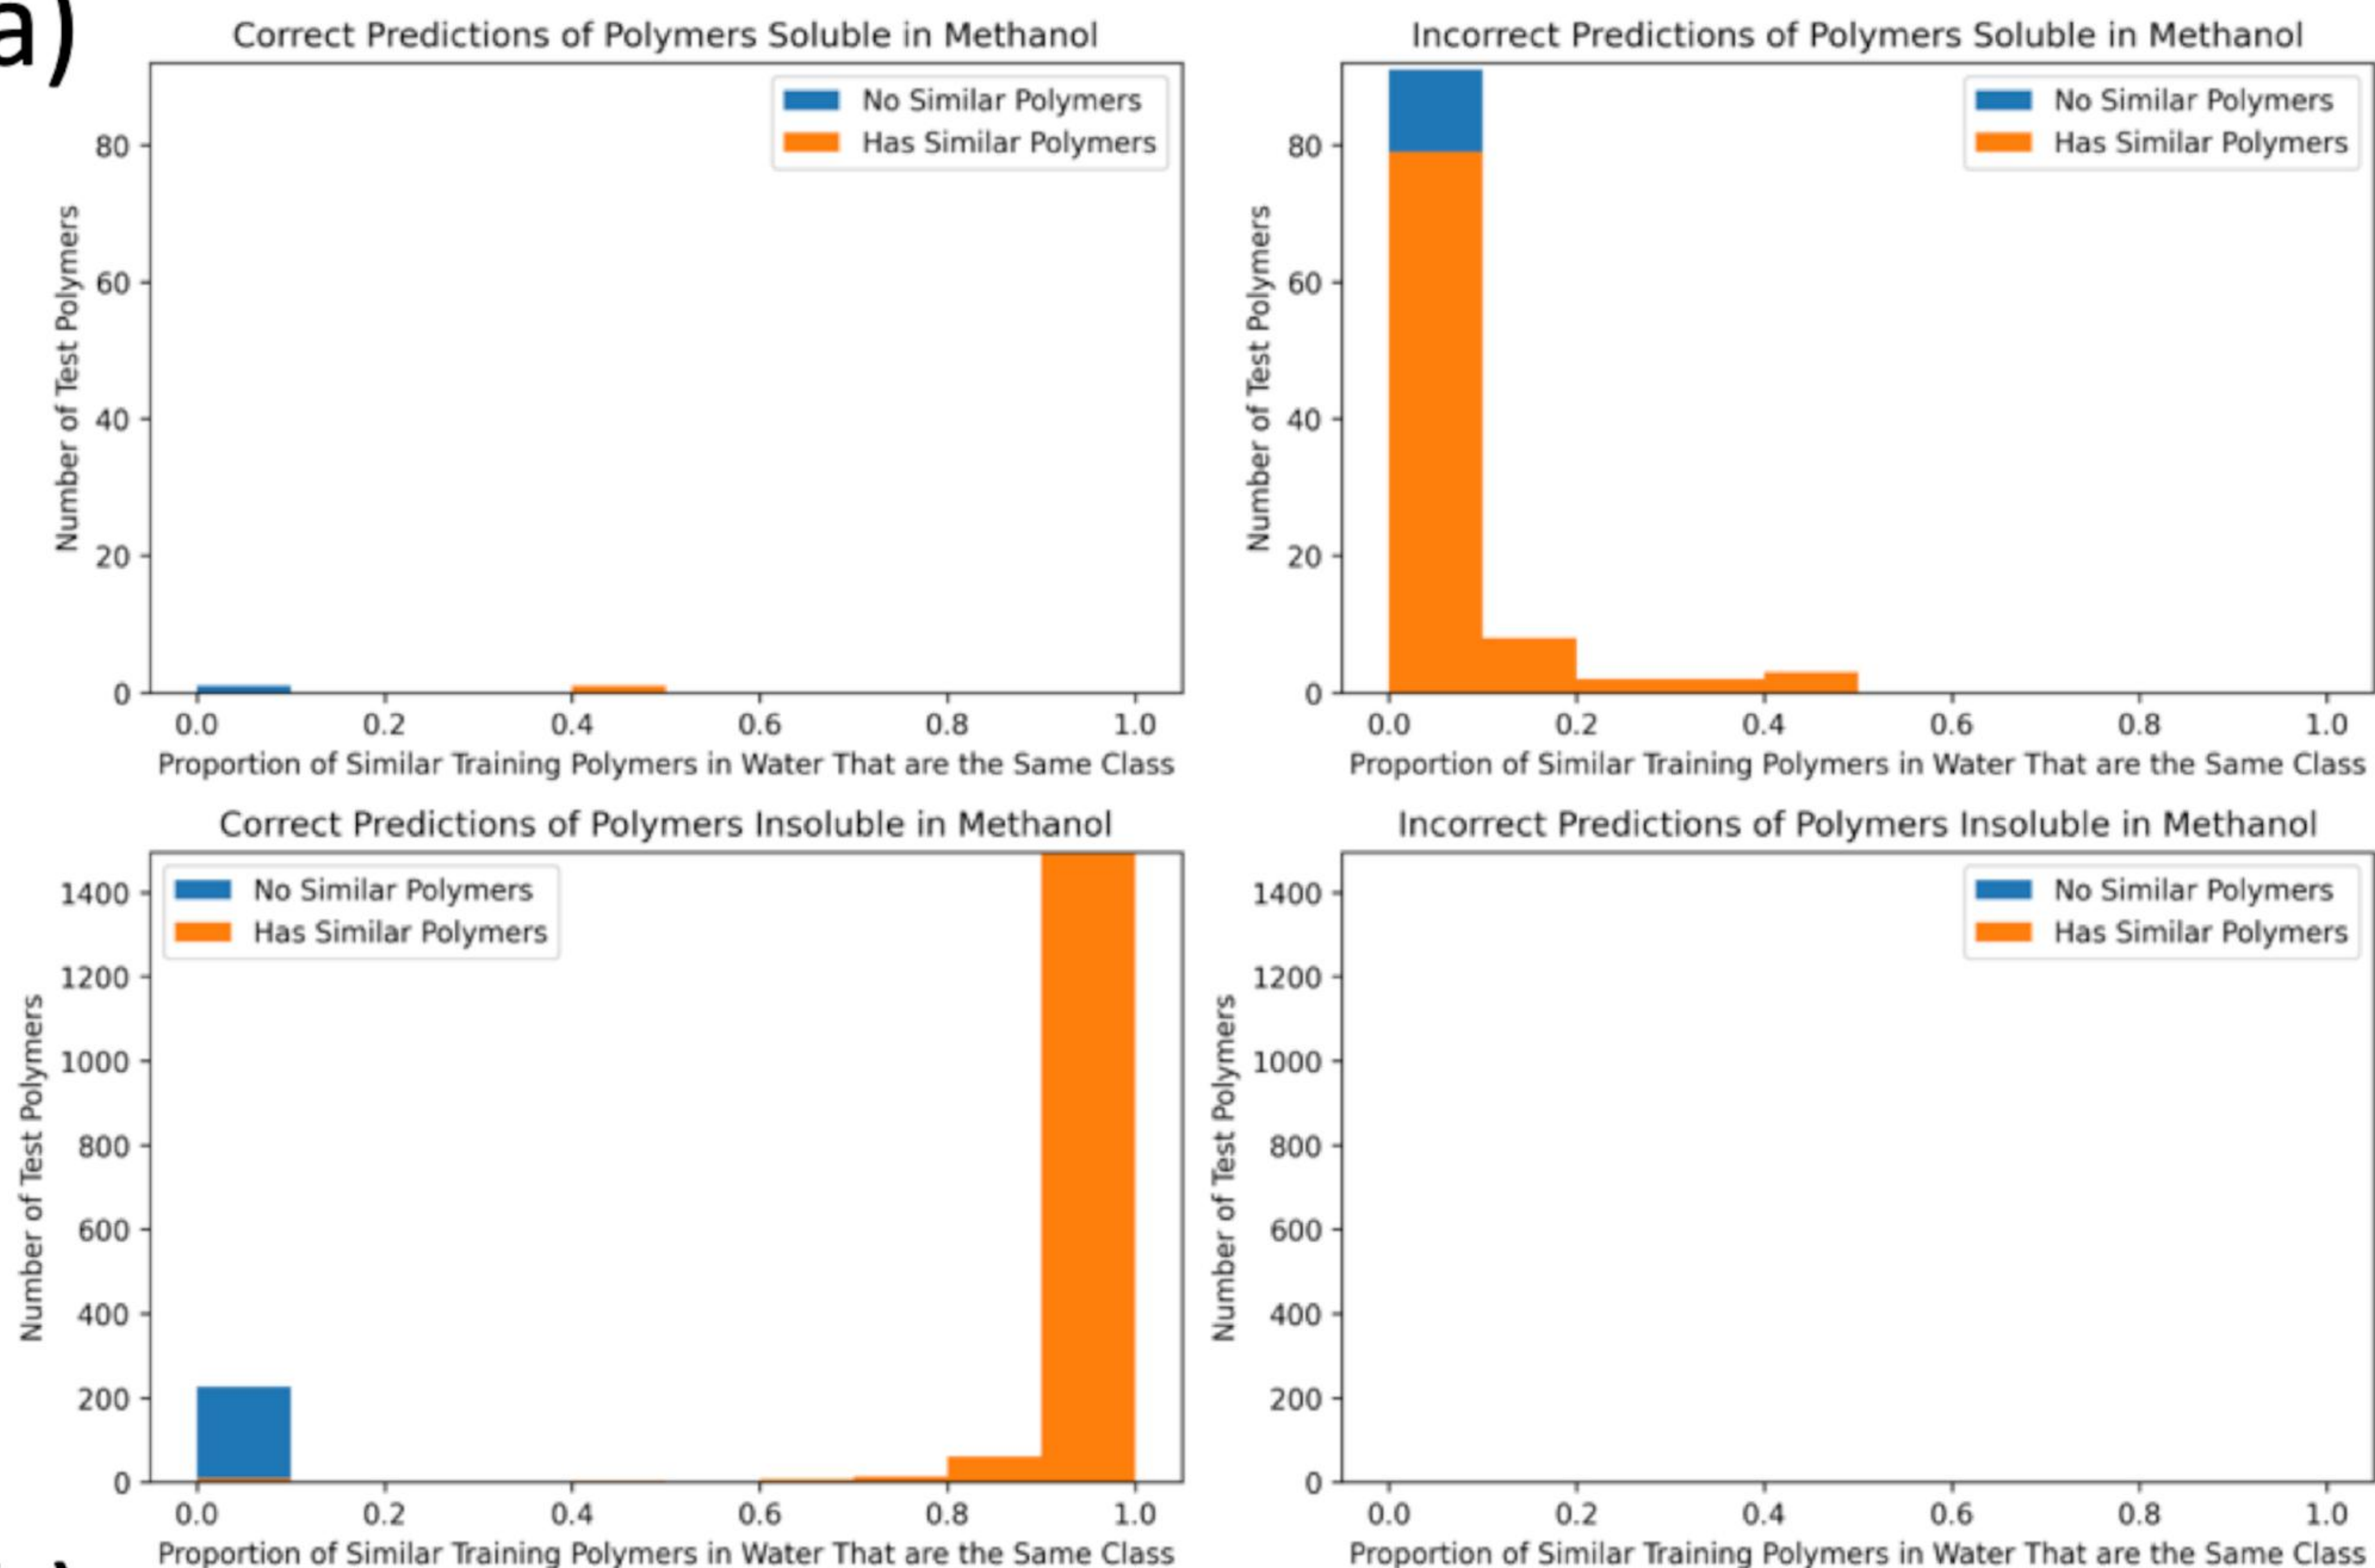

b)

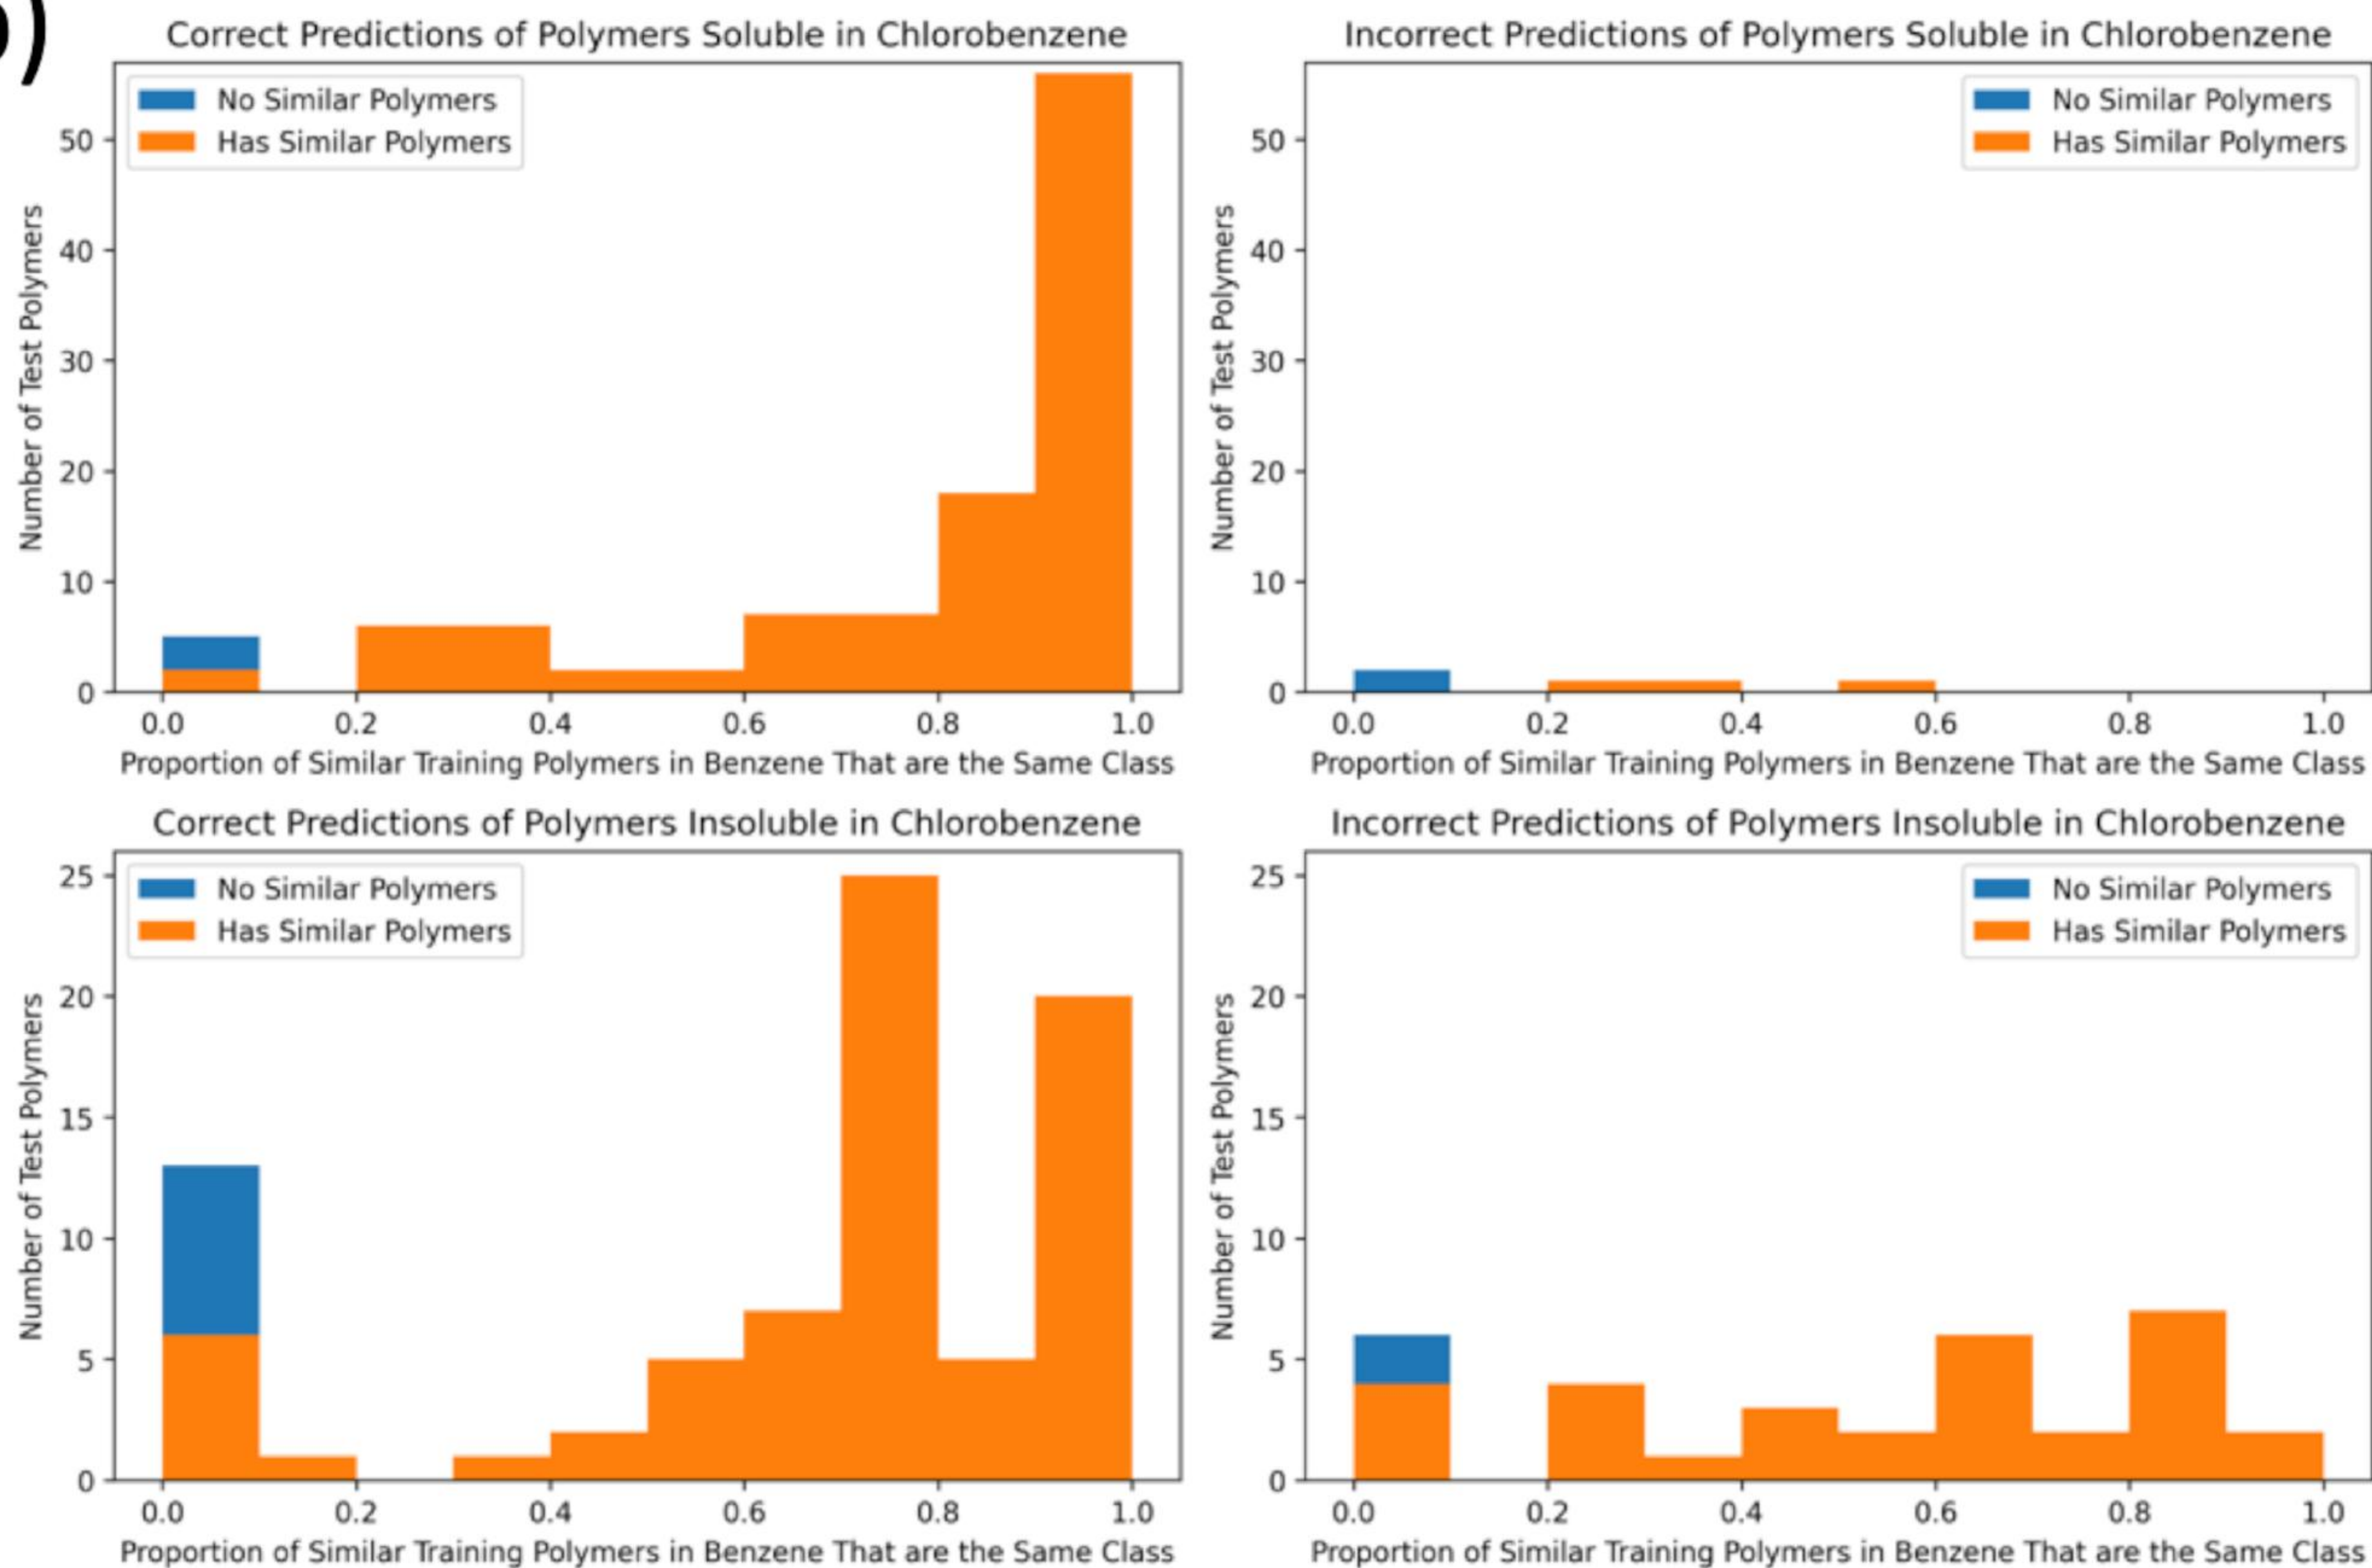

Supplement: d2cp03735a7.pdf [file d2cp03735a7.pdf]
